# Supplementary material for: Optimization of Supercritical Carbon Dioxide Extraction of Polyphenols from Black Rosehip and Their Bioaccessibility Using an In Vitro Digestion/Caco-2 Cell Model
Source: MDPI journal article supplement (doi:10.3390/foods12040781), 2023-02-11
Supplement: s1 [file s1]

## Supplementary Materials

**Table S1:** Independent variables and their coded & actual values used for optimization in Box-Behnken design.

| Independent variable                | Symbol | Coded levels |     |     |
|-------------------------------------|--------|--------------|-----|-----|
|                                     |        | −1           | 0   | 1   |
| Pressure, bar                       | X1     | 150          | 250 | 350 |
| Temperature, °C                     | X2     | 40           | 50  | 60  |
| Ethanol concentration, % EtOH (v/v) | X3     | 20           | 60  | 100 |

**Table S2:** Analysis of variance (ANOVA) of the regression model for the analyzed responses in SCO<sub>2</sub>-aqEtOH extraction.

| Source                    | Sum of squares |         |        |         |        |          |          | Mean of squares |         |        |         |        |          |           |
|---------------------------|----------------|---------|--------|---------|--------|----------|----------|-----------------|---------|--------|---------|--------|----------|-----------|
|                           | Y1             | Y2      | Y3     | Y4      | Y5     | Y6       | Y7       | Y1              | Y2      | Y3     | Y4      | Y5     | Y6       | Y7        |
| Model                     | 785.83         | 8540.10 | 25.30  | 184.795 | 110.16 | 52783.73 | 888400   | 98.23           | 1067.51 | 3.61   | 20.5328 | 18.36  | 7540.53  | 126900    |
| X1 (bar)                  | 17.40          | 138.86  | 0.0072 | 1.657   | 0.2592 | 518.42   | 1956.25  | 17.40           | 138.86  | 0.0072 | 0.2340  | 0.2592 | 518.42   | 1956.25   |
| X2 (°C)                   | 27.01          | 309.51  | 0.0435 | 1.557   | 0.0162 | 2542.41  | 39018.21 | 27.01           | 309.51  | 0.0435 | 6.9320  | 0.0162 | 2545.41  | 390018.21 |
| X3 (%)                    | 516.81         | 5390.85 | 22.75  | 139.246 | 86.07  | 43320.96 | 643890   | 516.82          | 5390.85 | 22.75  | 3.2821  | 86.07  | 43320.96 | 643900    |
| X1·X2                     | 1.56           |         | 0.0841 | 4.671   |        |          |          | 1.56            |         | 0.0841 | 4.6711  |        |          |           |
| X1.X3                     | 9.92           | 68.06   |        | 0.681   |        |          | 1874.89  | 9.92            | 68.06   |        | 0.6814  |        |          | 1874.89   |
| X2.X3                     | 4.00           | 331.06  | 0.4032 | 1.813   | 1.65   | 1668.72  | 20967.04 | 4.00            | 331.06  | 0.4032 | 1.8132  | 1.65   | 1668.72  | 20967.04  |
| X1 <sup>2</sup>           |                | 277.52  | 0.1464 | 10.557  | 1.39   | 485.00   | 5910.03  |                 | 277.52  | 0.1464 | 8.1937  | 1.39   | 485.00   | 5910.03   |
| X2 <sup>2</sup>           | 45.50          | 84.17   |        | 10.334  |        | 1395.84  |          | 45.50           | 84.17   |        | 9.0683  |        | 1395.84  |           |
| X3 <sup>2</sup>           | 153.67         | 1788.25 | 1.80   | 14.277  | 20.12  | 2406.60  | 170700   | 153.672         | 1788.25 | 1.80   | 14.2771 | 20.12  | 2406.60  | 170700    |
| Residual                  | 35.86          | 169.77  | 0.4246 | 4.911   | 2.84   | 1725.54  | 6367.16  | 4.48            | 21.22   | 0.0472 | 0.7015  | 0.2838 | 191.73   | 707.46    |
| Lack-of-Fit               | 17.27          | 51.66   | 0.2794 | 3.066   | 1.36   | 1238.57  | 3402.17  | 4.32            | 12.91   | 0.0559 | 1.0219  | 0.2273 | 247.71   | 680.43    |
| Pure Error                | 18.59          | 118.11  | 0.1452 | 1.845   | 1.47   | 486.97   | 2964.99  | 4.65            | 29.53   | 0.0363 | 0.4612  | 0.3685 | 121.74   | 741.25    |
| Total                     | 821.68         | 8709.87 | 25.72  | 189.705 | 113.00 | 54509.28 | 894800   |                 |         |        |         |        |          |           |
|                           | Y1             | Y2      | Y3     | Y4      | Y5     | Y6       | Y7       |                 |         |        |         |        |          |           |
| R <sup>2</sup> -Sq        | 0.9564         | 0.9805  | 0.9815 | 0.9741  | 0.9749 | 0.9683   | 0.9929   |                 |         |        |         |        |          |           |
| R <sup>2</sup> -Sq (pred) | 0.7600         | 0.9133  | 0.9103 | 0.7264  | 0.9267 | 0.8687   | 0.9732   |                 |         |        |         |        |          |           |
| R <sup>2</sup> -Sq (adj)  | 0.9127         | 0.9610  | 0.9671 | 0.9408  | 0.9598 | 0.9437   | 0.9873   |                 |         |        |         |        |          |           |

**Table S2: Cont.**

| Source          | <i>F</i> -value |        |        |        |        |        |        | <i>p</i> -value |          |          |          |          |          |          |
|-----------------|-----------------|--------|--------|--------|--------|--------|--------|-----------------|----------|----------|----------|----------|----------|----------|
|                 | Y1              | Y2     | Y3     | Y4     | Y5     | Y6     | Y7     | Y1              | Y2       | Y3       | Y4       | Y5       | Y6       | Y7       |
| Model           | 21.92           | 50.30  | 76.60  | 29.27  | 64.70  | 39.33  | 179.40 | 0.0001*         | <0.0001* | 0.0001*  | <0.0001* | <0.0001* | <0.0001* | <0.0001* |
| X1 (bar)        | 3.88            | 6.54   | 0.1526 | 2.36   | 0.9134 | 2.77   | 11.83  | 0.0843          | 0.0338** | 0.7051   | 0.1683   | 0.3617   | 0.1345   | 0.1307   |
| X2 (°C)         | 6.03            | 14.58  | 0.9222 | 2.21   | 0.0571 | 55.15  | 65.46  | 0.0396**        | 0.0051*  | 0.3620   | 0.1809   | 0.8160   | 0.0054*  | <0.0001* |
| X3 (%)          | 115.30          | 254.03 | 482.13 | 198.53 | 303.30 | 910.13 | 75.96  | <0.0001*        | <0.0001* | 0.0001*  | <0.0001* | <0.0001* | <0.0001* | <0.0001* |
| X1.X2           | 0.3486          |        | 1.78   | 6.65   |        |        |        | 0.5712          | 0.1111   | 0.2146   | 0.0365** |          |          |          |
| X1.X3           | 2.21            | 3.21   |        | 0.9585 |        |        | 2.64   | 0.1751          | 0.0042*  |          | 0.3602   |          |          |          |
| X2.X3           | 0.8924          | 15.60  | 8.55   | 2.60   | 5.82   | 2.65   | 29.63  | 0.3725          |          | 0.0169** | 0.1510   | 0.0365** | 0.0162** | 0.1380   |
| X1 <sup>2</sup> |                 | 13.08  | 3.10   | 11.70  | 4.89   | 29.64  | 8.35   |                 | 0.0068*  | 0.1120   | 0.0111** | 0.0515   | 0.1462   | 0.0004*  |
| X2 <sup>2</sup> | 10.15           | 3.97   |        | 12.90  |        | 8.35   |        | 0.00129         | 0.0816   |          | 0.0088*  |          | 0.0245** |          |
| X3 <sup>2</sup> | 34.29           | 84.27  | 38.24  | 20.34  | 70.92  | 241.33 | 241.36 | 0.0004          | <0.0001* | 0.0002*  | 0.0028*  | <0.0001* | 0.0063*  | 0.0179** |
| Lack-of-Fit     | 0.9286          | 0.4374 | 1.54   | 2.21   | 0.6167 | 0.9180 | 0.92   | 0.5277          | 0.7786   | 0.3484   | 0.2293   | 0.7161   | 0.2555   | 0.5483   |

Independent variables: X1, pressure (bar); X2, temperature (°C); X3, co-solvent concentration (%). Dependent variables: Y1, extraction yield (%); Y2, total phenolic content (mg GAE/g); Y3, catechin content (mg/g); Y4, total anthocyanin content (mg Cy3GE/g); Y5, Cy3G (mg/g); Y6, total antioxidant capacity by DPPH assay (mmol TE/g); and Y7, total antioxidant capacity by CUPRAC assay (mmol TE/g) all in dry basis. DF: Degree of freedom; F-Value: Fisher distribution value; *p*-Value: \* significance at  $p < 0.01$ ;

\*\* significance at  $p < 0.05$

**Table S3:** Effect of extraction method and solvent on yield, total phenolic content (TPC), and total anthocyanin content (TAC).

| Extraction Method          | Solvent                                | Solvent/<br>solid ratio<br>(mL/g) | Pressure<br>(bar) | Time<br>(min) | Temperature<br>(°C) | Yield (%)                  | TPC<br>(mg GAE/g)          | TAC<br>(mg Cy3GE/g)       |
|----------------------------|----------------------------------------|-----------------------------------|-------------------|---------------|---------------------|----------------------------|----------------------------|---------------------------|
| PH-H <sub>2</sub> O        | Water                                  | 10                                | 100               | 60            | 75                  | 27.90 ± 1.60 <sup>ab</sup> | 68.90 ± 3.94 <sup>d</sup>  | 5.28 ± 0.40 <sup>d</sup>  |
| SCO <sub>2</sub> -aqEtOH * | 90 CO <sub>2</sub> :10 aqEtOH<br>(25%) | 25                                | 280               | 60            | 60                  | 25.05 ± 1.54 <sup>b</sup>  | 76.58 ± 4.25 <sup>c</sup>  | 10.89 ± 0.56 <sup>b</sup> |
| UA- EtOH                   | Ethanol                                | 25                                | -                 | 60            | 24                  | 23.75 ± 0.82 <sup>c</sup>  | 81.02 ± 2.10 <sup>ab</sup> | 6.05 ± 0.23 <sup>d</sup>  |
| UA- MeOH                   | Methanol                               | 25                                | -                 | 60            | 24                  | 30.95 ± 1.35 <sup>a</sup>  | 89.55 ± 1.60 <sup>a</sup>  | 13.32 ± 0.11 <sup>a</sup> |
| Maceration- EtOH           | Ethanol                                | 25                                | -                 | 60            | 24                  | 18.50 ± 1.27 <sup>c</sup>  | 71.28 ± 1.42 <sup>cd</sup> | 5.32 ± 0.12 <sup>d</sup>  |
| Maceration- MeOH           | Methanol                               | 25                                | -                 | 60            | 24                  | 26.56 ± 1.50 <sup>b</sup>  | 78.43 ± 2.04 <sup>bc</sup> | 9.41 ± 0.17 <sup>c</sup>  |

\*denotes dynamic extraction process

**Table S4:** Changes of phenolic compounds in different black rosehip extracts during *in vitro* digestion. Results are expressed as  $\mu\text{g}/\text{mL}$  digesta.

| Extract                        | Nondigested                      | Digested fraction <sup>1</sup>  | Aqueous fraction <sup>2</sup>   | Micellar fraction <sup>3</sup> |
|--------------------------------|----------------------------------|---------------------------------|---------------------------------|--------------------------------|
| <i>Catechin</i>                |                                  |                                 |                                 |                                |
| SCO <sub>2</sub> -aqEtOH       | 1070.4 $\pm$ 23.9 <sup>Ba</sup>  | 459.9 $\pm$ 54.0 <sup>Bb</sup>  | 401.9 $\pm$ 88.1 <sup>Bbc</sup> | 323.2 $\pm$ 36.5 <sup>Bc</sup> |
| UA-EtOH                        | 1642.5 $\pm$ 262.2 <sup>Aa</sup> | 721.5 $\pm$ 109.2 <sup>Ab</sup> | 638.9 $\pm$ 114.1 <sup>Ab</sup> | 495.4 $\pm$ 60.5 <sup>Ab</sup> |
| PH-H <sub>2</sub> O            | 961.1 $\pm$ 37.4 <sup>Ba</sup>   | 418.5 $\pm$ 77.6 <sup>Bb</sup>  | 365.9 $\pm$ 90.2 <sup>Bb</sup>  | 238.2 $\pm$ 22.3 <sup>Cc</sup> |
| <i>Epicatechin</i>             |                                  |                                 |                                 |                                |
| SCO <sub>2</sub> -aqEtOH       | 406.6 $\pm$ 52.5 <sup>Aa</sup>   | 157.4 $\pm$ 19.5 <sup>Ab</sup>  | 125.4 $\pm$ 35.1 <sup>Ab</sup>  | 119.7 $\pm$ 12.8 <sup>Ab</sup> |
| UA-EtOH                        | 388.3 $\pm$ 98.1 <sup>Aa</sup>   | 140.8 $\pm$ 30.6 <sup>ABb</sup> | 116.5 $\pm$ 30.6 <sup>Ab</sup>  | 101.5 $\pm$ 32.4 <sup>Ab</sup> |
| PH-H <sub>2</sub> O            | 255.0 $\pm$ 31.1 <sup>Ba</sup>   | 114.2 $\pm$ 30.2 <sup>Bb</sup>  | 87.5 $\pm$ 24.6 <sup>Abc</sup>  | 61.8 $\pm$ 6.4 <sup>Bc</sup>   |
| <i>Quercetin-3-O-glucoside</i> |                                  |                                 |                                 |                                |
| SCO <sub>2</sub> -aqEtOH       | 510.7 $\pm$ 10.7 <sup>Aa</sup>   | 146.9 $\pm$ 10.0 <sup>Ab</sup>  | 136.4 $\pm$ 4.0 <sup>Ab</sup>   | 127.7 $\pm$ 9.7 <sup>Ab</sup>  |
| UA-EtOH                        | 479.3 $\pm$ 4.3 <sup>Ba</sup>    | 137.1 $\pm$ 16.3 <sup>Bb</sup>  | 123.8 $\pm$ 14.9 <sup>Abc</sup> | 98.1 $\pm$ 11.0 <sup>Bc</sup>  |
| PH-H <sub>2</sub> O            | 252.9 $\pm$ 12.1 <sup>Ca</sup>   | 61.5 $\pm$ 5.3 <sup>Cb</sup>    | 52.8 $\pm$ 3.6 <sup>Bb</sup>    | 46.3 $\pm$ 4.4 <sup>Cb</sup>   |
| <i>Vanillin</i>                |                                  |                                 |                                 |                                |
| SCO <sub>2</sub> -aqEtOH       | 37.6 $\pm$ 2.0 <sup>Aa</sup>     | 14.8 $\pm$ 1.4 <sup>Ab</sup>    | 9.8 $\pm$ 1.3 <sup>Ac</sup>     | 9.0 $\pm$ 0.5 <sup>Ac</sup>    |
| UA-EtOH                        | 28.3 $\pm$ 3.1 <sup>Ba</sup>     | 8.4 $\pm$ 1.7 <sup>ABb</sup>    | 7.2 $\pm$ 1.4 <sup>Bb</sup>     | 6.4 $\pm$ 0.5 <sup>Bb</sup>    |
| PH-H <sub>2</sub> O            | 21.8 $\pm$ 0.4 <sup>Ca</sup>     | 7.9 $\pm$ 1.3 <sup>Bb</sup>     | 6.6 $\pm$ 0.1 <sup>Bc</sup>     | 6.0 $\pm$ 0.6 <sup>Bc</sup>    |

Data are given as mean  $\pm$  SD (n=6); One Way Analysis of Variance (ANOVA) coupled with the Tukey's post-hoc analysis to identify means with significant differences ( $p < 0.05$ ) in each extracts indicated by different capital letters (same column) and among digestion phase by different lowercase letters. <sup>1</sup> The phenolic amount in the whole digests. <sup>2</sup> Supernatant taken after the digesta was centrifuged (4,700  $\times$ g, 60 min, 4 °C). <sup>3</sup> Supernatant taken after centrifuged digesta filtered (0.2 $\mu$ m).

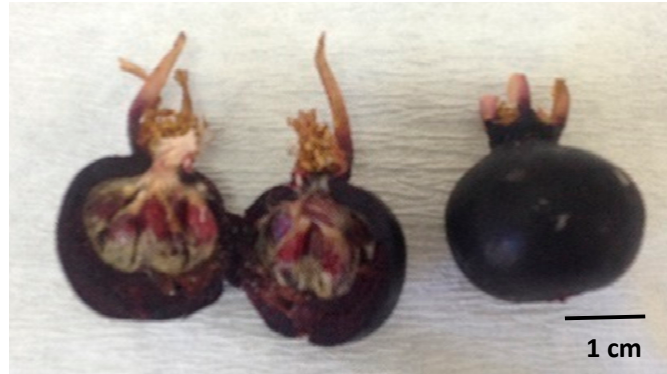

**Figure S1:** Morphology of fresh black rosehips.

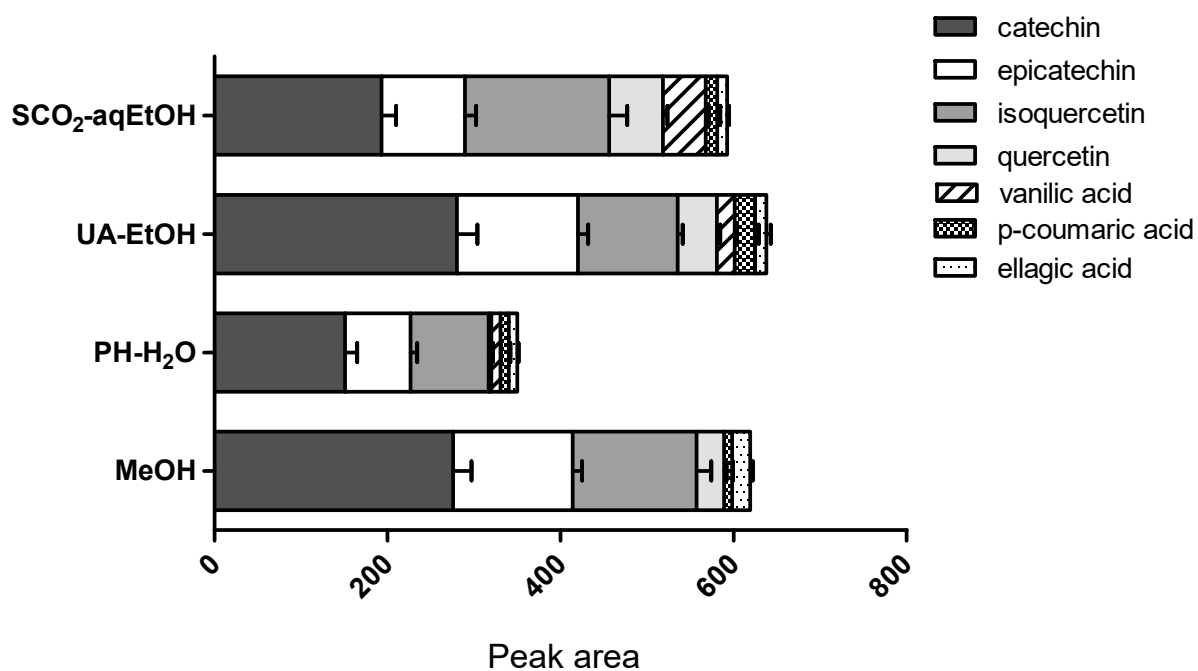

**Figure S2.** Composition of major phenolic compounds from black rosehip extracts analyzed by LC-MS/MS. MeOH represents black rosehip extract obtained by maceration using methanol as solvent for 60 mins.

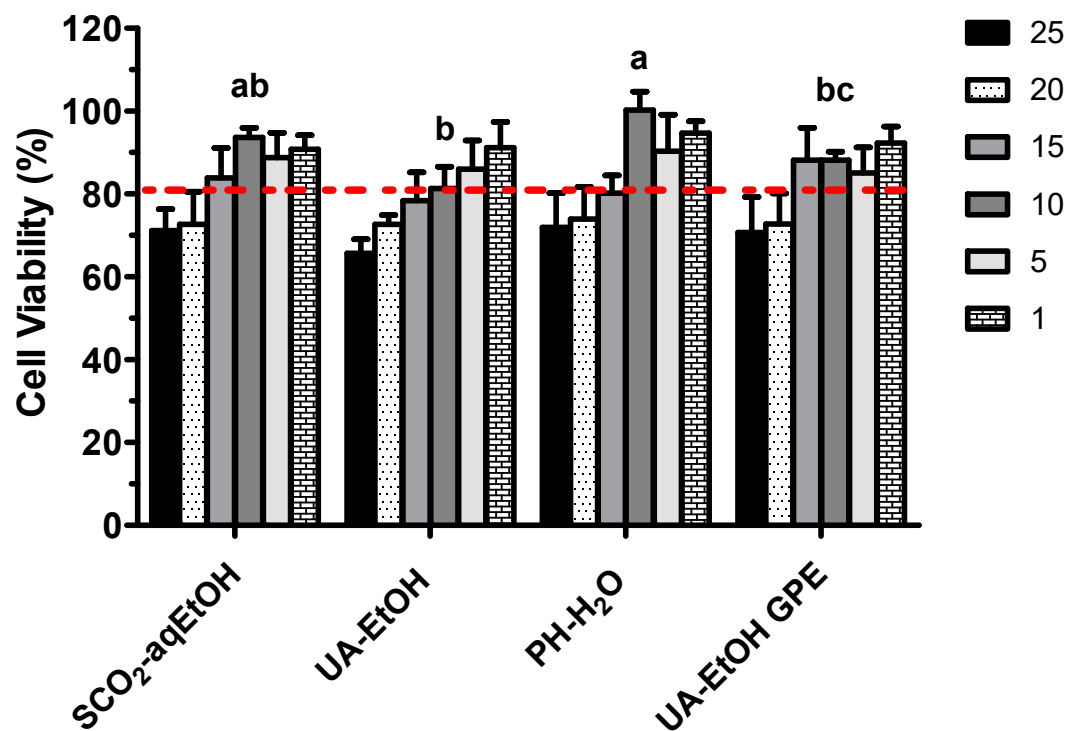

**Figure S3.** Cell viabilities of Caco-2 cells after treatment of different black rosehip extracts at varying doses (mg/mL). Bars represent standard deviation (n=3).
